# Supplementary material for: Constitutive Cytomorphologic Features of Medullary Thyroid Carcinoma Using Different Staining Methods
Source: MDPI journal article supplement (doi:10.3390/diagnostics11081396), 2021-08-02
Supplement: s1 [file s1]

**Table S1.** Cytomorphologic characteristics by different staining methods (excluding unsatisfactory specimen)(total n=19)

| Parameter/Stain                 | Papanicolaou stain<br>(n = 11) | Romanowsky stain<br>(n = 7) | H&E stain<br>(n = 1) | P-value# |
|---------------------------------|--------------------------------|-----------------------------|----------------------|----------|
| High cellularity                | 9 (82%)                        | 7 (100%)                    | 1 (100%)             | 0.550    |
| Cellular pleomorphism           | 10 (91%)                       | 6 (86%)                     | 0 (0%)               | 0.194    |
| Plasmacytoid cells              | 5 (45%)                        | 4 (57%)                     | 1 (100%)             | 1.000    |
| Round cells                     | 11 (100%)                      | 7 (100%)                    | 1 (100%)             | -        |
| Polygonal cells                 | 6 (55%)                        | 6 (86%)                     | 0 (0%)               | 0.211    |
| Spindled cells                  | 2 (18%)                        | 2 (29%)                     | 0 (0%)               | 1.000    |
| Dyshesive cells                 | 4 (36%)                        | 2 (29%)                     | 0 (0%)               | 1.000    |
| Salt-and-pepper chromatin       | 6 (55%)                        | 1 (14%)                     | 0 (0%)               | 0.211    |
| Pseudoinclusion                 | 2 (18%)                        | 0 (0%)                      | 0 (0%)               | 0.550    |
| Visible nucleoli                | 2 (18%)                        | 0 (0%)                      | 0 (0%)               | 0.550    |
| Nuclear molding                 | 2 (18%)                        | 1 (14%)                     | 1 (100%)             | 0.404    |
| Granular cytoplasm              | 6 (55%)                        | 3 (43%)                     | 0 (0%)               | 1.000    |
| Binucleation or multinucleation | 7 (64%)                        | 6 (86%)                     | 0 (0%)               | 0.285    |

# Fisher's exact test.

**Table S2.** Background characteristics by different staining methods (excluding unsatisfactory specimen)(total n=19)

| Parameter/Stain | Papanicolaou stain<br>(n = 11) | Romanowsky stain<br>(n = 7) | H&E stain<br>(n = 1) | P-value# |
|-----------------|--------------------------------|-----------------------------|----------------------|----------|
| Clean           | 5 (45%)                        | 4 (57%)                     | 0 (0%)               | 1.000    |
| Bloody          | 6 (55%)                        | 3 (43%)                     | 1 (100%)             | 1.000    |
| Low cellularity | 2 (18%)                        | 1 (14%)                     | 0 (0%)               | 1.000    |
| Air drying      | 1 (9%)                         | 1 (14%)                     | 0 (0%)               | 1.000    |
| Amyloid         | 2 (18%)                        | 1 (14%)                     | 0 (0%)               | 1.000    |
| Colloid         | 3 (27%)                        | 3 (43%)                     | 0 (0%)               | 0.745    |
| Calcification   | 0 (0%)                         | 0 (0%)                      | 0 (0%)               | -        |

# Fisher's exact test.

**Table S3.** Cytomorphologic characteristics by different cytologic diagnoses (exclude unsatisfactory specimen)(total n=19)

| Parameter/Diagnosis             | FN/FN-H/SFN<br>(n = 13) | AUS/FLUS<br>(n = 4)  | Malignancy, NOS<br>(n = 2) | P-value#         |
|---------------------------------|-------------------------|----------------------|----------------------------|------------------|
| High cellularity                | 13 (100%)               | 0 (0%) <sup>a</sup>  | 2 (100%) <sup>b</sup>      | <b>&lt;0.001</b> |
| Cellular pleomorphism           | 10 (77%)                | 4 (100%)             | 2 (100%)                   | 0.678            |
| Plasmacytoid cells              | 7 (54%)                 | 2 (50%)              | 1 (50%)                    | 1.000            |
| Round cells                     | 13 (100%)               | 4 (100%)             | 2 (100%)                   | -                |
| Polygonal cells                 | 10 (77%)                | 0 (0%) <sup>a</sup>  | 2 (100%) <sup>b</sup>      | <b>0.009</b>     |
| Spindled cells                  | 4 (31%)                 | 0 (0%)               | 0 (0%)                     | 0.705            |
| Dyshesive cells                 | 4 (31%)                 | 0 (0%)               | 2 (100%)                   | 0.072            |
| Salt-and-pepper chromatin       | 3 (23%)                 | 3 (75%)              | 1 (50%)                    | 0.154            |
| Pseudoinclusion                 | 0 (0%)                  | 0 (0%)               | 2 (100%) <sup>a,b</sup>    | <b>0.006</b>     |
| Visible nucleoli                | 2 (15%)                 | 0 (0%)               | 0 (0%)                     | 1.000            |
| Nuclear molding                 | 0 (0%)                  | 2 (50%) <sup>a</sup> | 1 (50%) <sup>a</sup>       | <b>0.021</b>     |
| Granular cytoplasm              | 5 (38%)                 | 2 (50%)              | 2 (100%)                   | 0.406            |
| Binucleation or multinucleation | 10 (77%)                | 1 (25%)              | 2 (100%)                   | 0.157            |

# Fisher's exact test; a:  $p < 0.05$  versus FN/FN-H/SFN; b:  $p < 0.05$  versus AUS/FLUS.

**Table S4.** Background characteristics by different cytologic diagnoses (exclude unsatisfactory specimen)(total n=19)

| Parameter/Diagnosis | FN/FN-H/SFN (n = 13) | AUS/FLUS (n = 4)     | Malignancy, NOS (n = 2) | P-value#     |
|---------------------|----------------------|----------------------|-------------------------|--------------|
| Clean               | 5 (38%)              | 2 (50%)              | 2 (100%)                | 0.406        |
| Bloody              | 8 (62%)              | 2 (50%)              | 0 (0%)                  | 0.406        |
| Low cellularity     | 0 (0%)               | 3 (75%) <sup>a</sup> | 0 (0%)                  | <b>0.008</b> |
| Air drying          | 0 (0%)               | 2 (50%) <sup>a</sup> | 0 (0%)                  | <b>0.041</b> |
| Amyloid             | 1 (8%)               | 2 (50%)              | 0 (0%)                  | 0.115        |
| Colloid             | 3 (23%)              | 3 (75%)              | 0 (0%)                  | 0.157        |
| Calcification       | 0 (0%)               | 0 (0%)               | 0 (0%)                  | -            |

# Fisher's exact test; a:  $p < 0.05$  versus FN/FN-H/SFN.

**Table S5.** The comparison of cytomorphologic characteristics between accurately and incorrectly categorized cases

| Parameter                       | Accurately categorized<br>(n = 148) | Incorrectly categorized<br>(n = 19) | P-value#         |
|---------------------------------|-------------------------------------|-------------------------------------|------------------|
| High cellularity                | 128 (86%)                           | 17 (89%)                            | 1.000            |
| Cellular pleomorphism           | 129 (87%)                           | 16 (84%)                            | 0.720            |
| Plasmacytoid cells              | 106 (72%)                           | 10 (53%)                            | 0.113            |
| Round cells                     | 107 (72%)                           | 19 (100%)                           | <b>0.004</b>     |
| Polygonal cells                 | 82 (55%)                            | 12 (63%)                            | 0.627            |
| Spindled cells                  | 70 (47%)                            | 4 (21%)                             | <b>0.047</b>     |
| Dyshesive cells                 | 140 (95%)                           | 6 (32%)                             | <b>&lt;0.001</b> |
| Salt-and-pepper chromatin       | 141 (95%)                           | 7 (37%)                             | <b>&lt;0.001</b> |
| Pseudoinclusion                 | 46 (31%)                            | 2 (11%)                             | 0.103            |
| Visible nucleoli                | 6 (4%)                              | 2 (11%)                             | 0.227            |
| Nuclear molding                 | 81 (55%)                            | 4 (21%)                             | <b>0.007</b>     |
| Granular cytoplasm              | 45 (30%)                            | 9 (47%)                             | 0.191            |
| Binucleation or multinucleation | 100 (68%)                           | 13 (68%)                            | 1.000            |

# Fisher's exact test.

**Table S6.** The comparison of background characteristics between accurately and incorrectly categorized cases

| Parameter       | Accurately categorized (n = 148) | Incorrectly categorized (n = 19) | P-value#     |
|-----------------|----------------------------------|----------------------------------|--------------|
| Clean           | 103 (70%)                        | 9 (47%)                          | 0.069        |
| Bloody          | 58 (39%)                         | 10 (53%)                         | 0.323        |
| Low cellularity | 20 (14%)                         | 3 (16%)                          | 0.729        |
| Air drying      | 39 (24%)                         | 2 (11%)                          | 0.164        |
| Amyloid         | 71 (48%)                         | 3 (16%)                          | <b>0.012</b> |
| Colloid         | 34 (23%)                         | 6 (22%)                          | 0.402        |
| Calcification   | 7 (5%)                           | 0 (0%)                           | 1.000        |

# Fisher's exact test.
